# Supplementary material for: Pressure-induced novel ZrN4 semiconductor materials with high dielectric constants: a first-principles study
Source: Royal Society of Chemistry journal article supplement (doi:10.1039/d3cp03949h), 2023-01-01
Supplement: d3cp03949h1.pdf [file d3cp03949h1.pdf]

# **Pressure-induced novel semiconductor materials with high dielectric constant in $ZrN_4$ : a first-principles study**

Shaoting Yao<sup>1</sup>, Junzhao Li<sup>1</sup>, Le Huang<sup>2</sup>, Xing Xie<sup>3</sup>, Huafeng Dong<sup>1</sup>, Hui Long<sup>1</sup>, Xin Zhang<sup>1</sup>, Fugen Wu<sup>2</sup>, Zhongfei Mu<sup>4</sup> and Minru Wen<sup>1,\*</sup>

<sup>1</sup>*School of Physics and Optoelectronic Engineering, Guangdong University of Technology, Guangzhou 510006, China*

<sup>2</sup>*School of Materials and Energy, Guangdong University of Technology, Guangzhou 510006, China*

<sup>3</sup>*School of Physics and Electronics, Hunan Key Laboratory for Super-microstructure and Ultrafast Process, Central South University, 932 South Lushan Road, Changsha, Hunan 410083, People's Republic of China*

<sup>4</sup>*Experimental Teaching Department, Guangdong University of Technology, Guangzhou, 510006, China*

\*E-mail: mrwen@gdut.edu.cn

Table S1 The lattice parameters and Wyckoff positions of the eight novel phases(Å).

| Phase                 | Lattice parameters (Å, degree)                                                                        | Wyckoff positions     |                                                                                                     |        |        |        |       |        |
|-----------------------|-------------------------------------------------------------------------------------------------------|-----------------------|-----------------------------------------------------------------------------------------------------|--------|--------|--------|-------|--------|
|                       |                                                                                                       | atom                  | site                                                                                                | x      | y      | z      |       |        |
| $\alpha$ - $P1$       | $a = 6.433, b = 3.586, c = 8.961$<br>$\alpha = 88.9^\circ, \beta = 103.7^\circ, \gamma = 90.6^\circ$  | Zr1                   | 1a                                                                                                  | 0.211  | 0.601  | 0.608  |       |        |
|                       |                                                                                                       | Zr2                   | 1a                                                                                                  | 0.815  | 0.098  | 0.511  |       |        |
|                       |                                                                                                       | N1                    | 1a                                                                                                  | 0.052  | 0.142  | 0.085  |       |        |
|                       |                                                                                                       | N2                    | 1a                                                                                                  | 0.643  | 0.682  | 0.009  |       |        |
|                       |                                                                                                       | N3                    | 1a                                                                                                  | 0.506  | 0.484  | -0.003 |       |        |
|                       |                                                                                                       | N4                    | 1a                                                                                                  | 0.195  | 0.989  | 0.151  |       |        |
|                       |                                                                                                       | N5                    | 1a                                                                                                  | 0.934  | 0.618  | 0.442  |       |        |
|                       |                                                                                                       | N6                    | 1a                                                                                                  | 0.469  | 0.242  | 0.520  |       |        |
| $P_4/mmm$             | $a = 3.711, b = 3.676, c = 4.020$<br>$\alpha = 90.0^\circ, \beta = 90.0^\circ, \gamma = 90.0^\circ$   | Zr1                   | 1b                                                                                                  | 1.000  | 1.000  | 0.500  |       |        |
|                       |                                                                                                       | N1                    | 4i                                                                                                  | 1.000  | 0.500  | 0.152  |       |        |
|                       |                                                                                                       | $\alpha$ - $P\bar{1}$ | $a = 3.998, b = 4.909, c = 5.161$<br>$\alpha = 76.2^\circ, \beta = 90.1^\circ, \gamma = 97.8^\circ$ | Zr1    | 2i     | -0.733 | 1.166 | -1.282 |
|                       |                                                                                                       |                       |                                                                                                     | N1     | 2i     | -0.297 | 0.602 | -1.249 |
|                       |                                                                                                       |                       |                                                                                                     | N2     | 2i     | -0.239 | 1.107 | -1.414 |
|                       |                                                                                                       |                       |                                                                                                     | N3     | 2i     | 0.040  | 1.531 | -1.885 |
|                       |                                                                                                       | $\alpha$ - $P2_1/m$   | $a = 4.381, b = 4.930, c = 4.017$<br>$\alpha = 90.0^\circ, \beta = 91.8^\circ, \gamma = 90.0^\circ$ | N4     | 2i     | -0.304 | 0.877 | -1.175 |
|                       |                                                                                                       |                       |                                                                                                     | Zr1    | 2e     | 0.780  | 0.250 | 1.417  |
| N1                    | 2e                                                                                                    |                       |                                                                                                     | 0.699  | 0.750  | 0.988  |       |        |
| N2                    | 2e                                                                                                    |                       |                                                                                                     | 0.317  | 0.250  | 1.658  |       |        |
| $\beta$ - $P\bar{1}$  | $a = 4.976, b = 4.459, c = 4.797$<br>$\alpha = 77.8^\circ, \beta = 100.8^\circ, \gamma = 111.4^\circ$ | N3                    | 4f                                                                                                  | 0.858  | 0.511  | 1.892  |       |        |
|                       |                                                                                                       | Zr1                   | 2i                                                                                                  | 0.279  | 0.713  | 0.783  |       |        |
|                       |                                                                                                       | N1                    | 2i                                                                                                  | -0.032 | -0.058 | 0.879  |       |        |
|                       |                                                                                                       | N2                    | 2i                                                                                                  | -0.237 | 0.032  | 0.687  |       |        |
| $\gamma$ - $P\bar{1}$ | $a = 4.111, b = 4.962, c = 4.443$<br>$\alpha = 78.6^\circ, \beta = 97.0^\circ, \gamma = 87.9^\circ$   | N3                    | 2i                                                                                                  | -0.244 | 0.345  | 0.720  |       |        |
|                       |                                                                                                       | N4                    | 2i                                                                                                  | 0.524  | 0.715  | 1.193  |       |        |
|                       |                                                                                                       | Zr1                   | 2i                                                                                                  | 0.291  | 0.833  | 0.788  |       |        |
|                       |                                                                                                       | N1                    | 2i                                                                                                  | 0.241  | 0.375  | 0.401  |       |        |
| $\beta$ - $P2_1/m$    | $a = 4.730, b = 4.898, c = 4.118$<br>$\alpha = 90.0^\circ, \beta = 109.2^\circ, \gamma = 90.0^\circ$  | N2                    | 2i                                                                                                  | 0.757  | 0.635  | 0.267  |       |        |
|                       |                                                                                                       | N3                    | 2i                                                                                                  | 0.902  | 0.359  | 0.777  |       |        |
|                       |                                                                                                       | N4                    | 2i                                                                                                  | 0.205  | 0.905  | 0.281  |       |        |
|                       |                                                                                                       | Zr1                   | 2e                                                                                                  | 1.218  | 0.250  | 1.505  |       |        |
| $\beta$ - $P1$        | $a = 4.970, b = 4.462, c = 7.041$<br>$\alpha = 83.6^\circ, \beta = 74.5^\circ, \gamma = 107.4^\circ$  | N1                    | 2e                                                                                                  | 1.288  | 0.750  | 1.119  |       |        |
|                       |                                                                                                       | N2                    | 2e                                                                                                  | 1.696  | 0.250  | 1.529  |       |        |
|                       |                                                                                                       | N3                    | 4f                                                                                                  | 0.858  | 0.490  | 0.046  |       |        |
|                       |                                                                                                       | Zr1                   | 1a                                                                                                  | 0.728  | 0.933  | 0.315  |       |        |
|                       |                                                                                                       | Zr2                   | 1a                                                                                                  | 0.082  | 0.347  | 0.708  |       |        |
|                       |                                                                                                       | Zr3                   | 1a                                                                                                  | 0.446  | 0.869  | 0.960  |       |        |
|                       |                                                                                                       | N1                    | 1a                                                                                                  | 0.436  | 0.355  | 0.067  |       |        |
|                       |                                                                                                       | N2                    | 1a                                                                                                  | 0.718  | 0.308  | 0.044  |       |        |

|     |    |       |       |       |
|-----|----|-------|-------|-------|
| N3  | 1a | 0.261 | 0.920 | 0.322 |
| N4  | 1a | 0.111 | 0.813 | 0.540 |
| N5  | 1a | 0.651 | 0.361 | 0.439 |
| N6  | 1a | 0.594 | 0.345 | 0.663 |
| N7  | 1a | 0.404 | 0.435 | 0.399 |
| N8  | 1a | 0.578 | 0.651 | 0.691 |
| N9  | 1a | 0.268 | 0.248 | 0.274 |
| N10 | 1a | 0.863 | 0.915 | 0.586 |
| N11 | 1a | 0.972 | 0.601 | 0.965 |
| N12 | 1a | 0.892 | 0.875 | 0.983 |

Table S2 Variation of lattice constants normalized with respect to their respective ground state values (i.e.  $\Delta a=(a_{150}-a_0)/a_0\times 100\%$ ,  $\Delta b=(b_{150}-b_0)/b_0\times 100\%$ ,  $\Delta c=(c_{150}-c_0)/c_0\times 100\%$ ) for  $\text{ZrN}_4$  semiconductor phases at 150 GPa.

| Phase                    | $\Delta a$ | $\Delta b$ | $\Delta c$ |
|--------------------------|------------|------------|------------|
| $\alpha\text{-}P\bar{1}$ | -22.23     | -15.28     | -2.92      |
| $\beta\text{-}P\bar{1}$  | -20.85     | -18.25     | 5.93       |
| $\gamma\text{-}P\bar{1}$ | -10.72     | -11.2      | -8.08      |
| $\beta\text{-}P1$        | -14.79     | -6.21      | -15.81     |

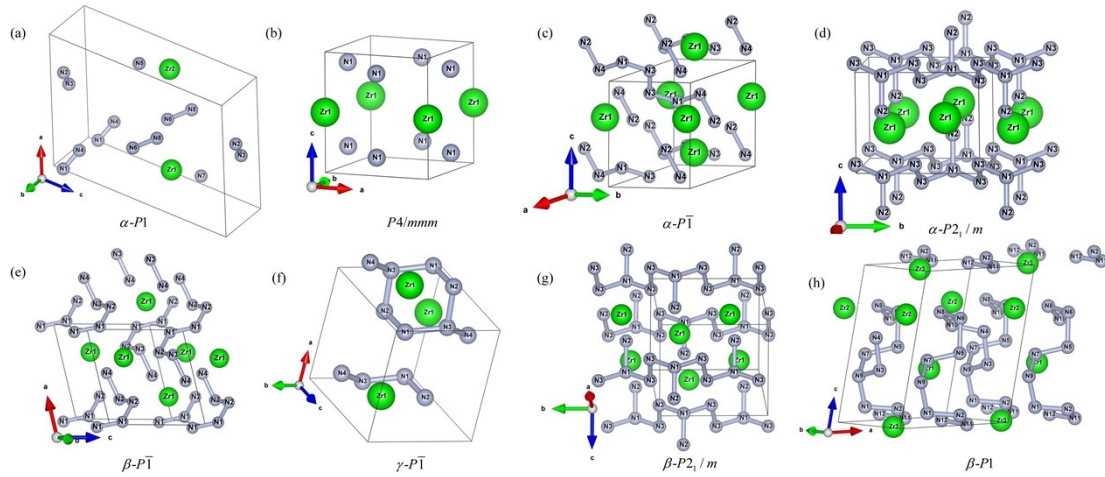

Fig. S1 Configurations of the nitrogen chains in (a)  $\alpha\text{-}P1$ , (b)  $P4/mmm$ , (c)  $\alpha\text{-}P\bar{1}$ , (d)  $\alpha\text{-}P2_1/m$ , (e)  $\beta\text{-}P\bar{1}$ , (f)  $\gamma\text{-}P\bar{1}$ , (g)  $\beta\text{-}P2_1/m$ , and (h)  $\beta\text{-}P1$  phase for  $\text{ZrN}_4$  at 0 GPa. The green and gray balls denote the Zr and N atoms, respectively.

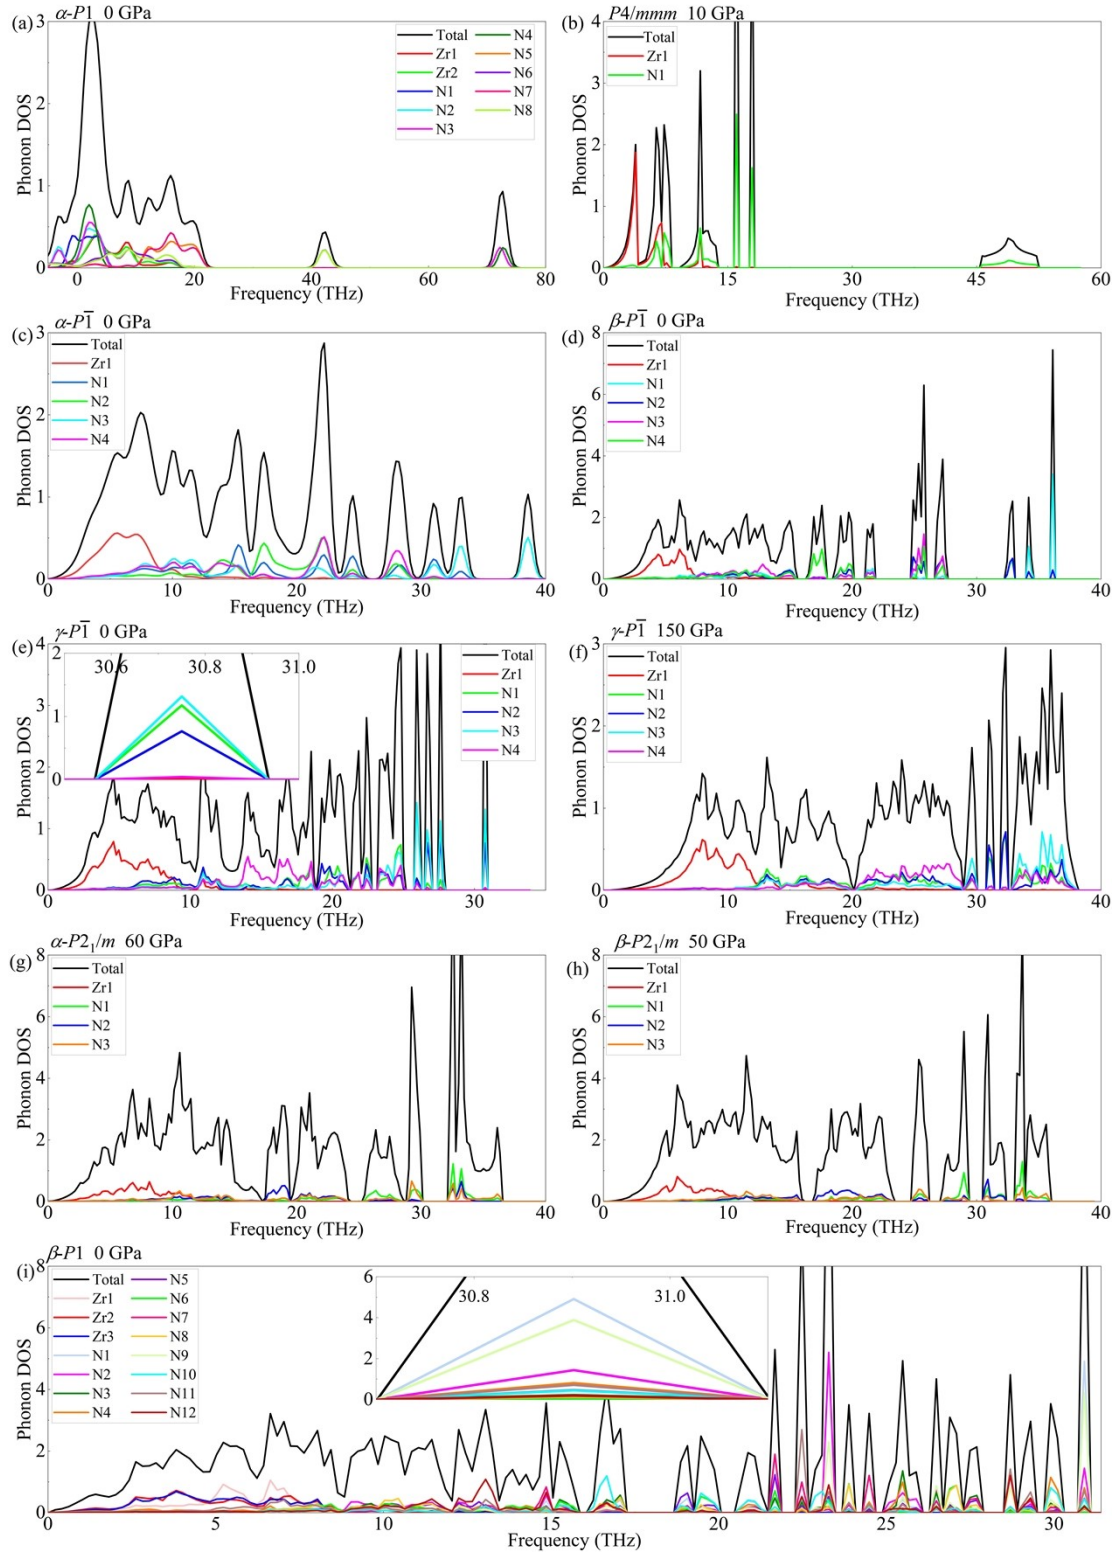

Fig. S2 Total phonon DOS and Partial phonon DOS for Zr and N atoms in ZrN<sub>4</sub>. The inset in (e) and (i) shows the phonon DOS in the frequency range of 30.5–31 GPa and 30.7–31.1 GPa, respectively.

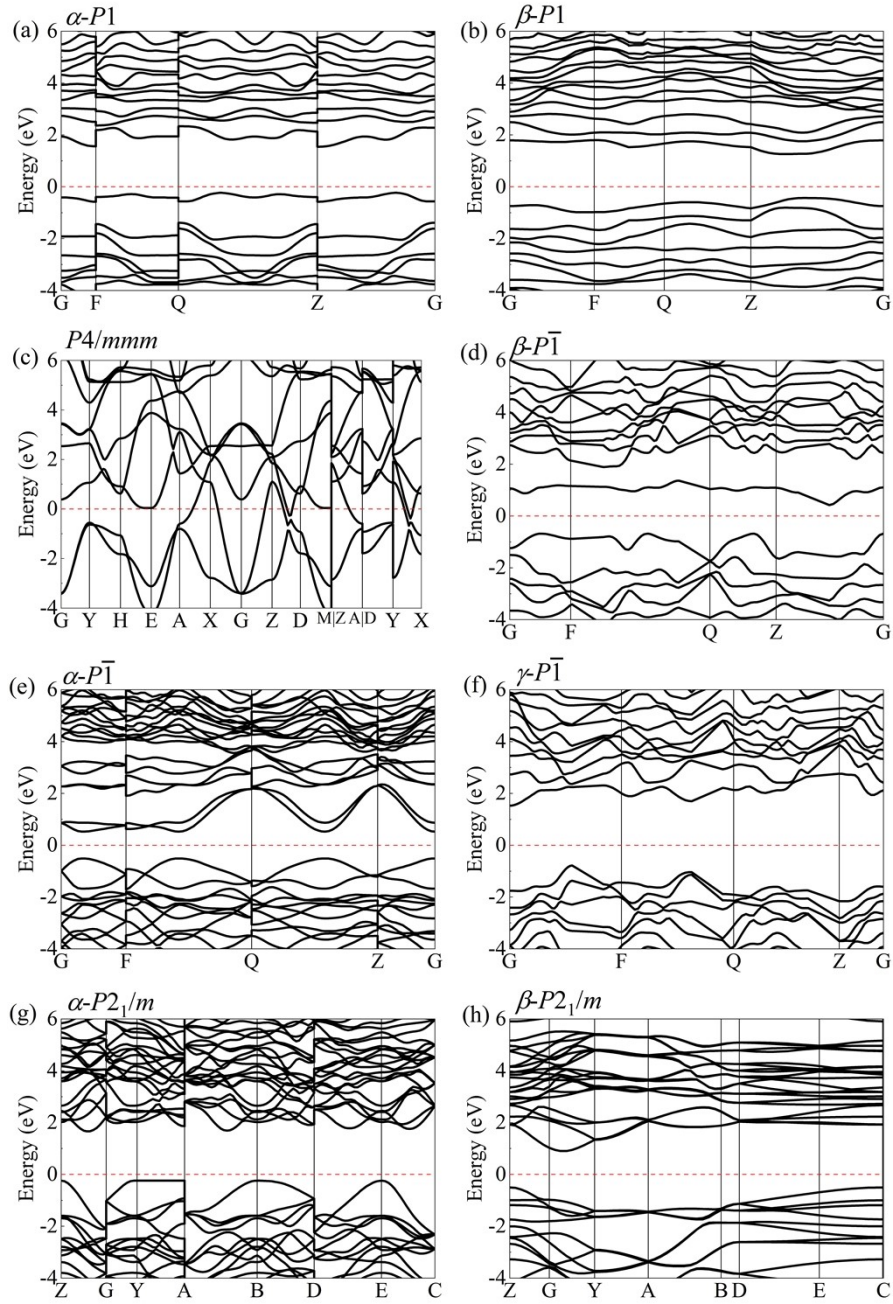

Fig. S3 The band of (a)  $\alpha$ -P1, (b)  $\beta$ -P1, (c)  $P4/mmm$ , (d)  $\beta$ - $P\bar{1}$ , (e)  $\alpha$ - $P\bar{1}$ , (f)  $\gamma$ - $P\bar{1}$ , (g)  $\alpha$ - $P2_1/m$ , and (h)  $\beta$ - $P2_1/m$  under HSE06 functional.
